# Supplementary material for: Metabolomic and transcriptomic analysis reveals endogenous substrates and metabolic adaptation in rats lacking Abcg2 and Abcb1a transporters
Source: PLoS One. 2021 Jul 13;16(7):e0253852. doi: 10.1371/journal.pone.0253852 (PMC8277073; doi:10.1371/journal.pone.0253852)
Supplement: S6 Table — (XLSX) [file pone.0253852.s013.xlsx]

## Sheet: Table S7
S6 Table. List of metabolites and associated in silico parameter values, PGP and BCRP ChEMBL score, fold change in CSF (dKO/WT) observed in metabolomic study
and associated p-value and log2 converted fold change
Subpathway	cpds	Pgp1 Score	ABCG2 Score	Fold Change in CSF (dKO/WT)	p value	Log2 (Fold Change)	ALogP	Molecular_Weight	HBA_Count	HBD_Count	Molecular_Polar Surface Area	ALogP98
Benzoate Metabolism	O-methylcatechol sulfate	0.405679	0.505668	5.52	2.7864e-06	2.46467	1.178	204.2	2	0	81.21	0
Urea cycle; Arginine and Proline Metabolism	N-delta-acetylornithine	0.354009	0.416973	1.57	7.0189e-06	0.650765	-3.675	174.198	2	2	92.41	-1.196
Riboflavin Metabolism	Riboflavin (Vitamin B2)	0.300552	0.455414	3.1	1.425e-05	1.63227	-0.255	376.364	4	5	155.04	-0.061
Urea cycle; Arginine and Proline Metabolism	Citrulline	0.344437	0.431984	1.79	1.6353e-05	0.83996	-3.885	175.186	2	3	118.43	-1.406
Urea cycle; Arginine and Proline Metabolism	Homocitrulline	0.358745	0.431984	2.13	2.0122e-05	1.09085	-3.429	189.212	2	3	118.44	-0.95
Purine Metabolism, (Hypo)Xanthine/Inosine containing	Urate	0.38431	0.485344	1.85	5.7516e-05	0.887525	-1.763	168.11	3	4	99.33	-1.569
Glycine, Serine and Threonine Metabolism	Serine	0.318157	0.411713	1.26	7.6763e-05	0.333424	-4.049	105.093	1	2	83.55	-1.571
Leucine, Isoleucine and Valine Metabolism	N-acetylleucine	0.217743	0.393194	1.31	8.1737e-05	0.389567	0.571	173.21	2	1	66.39	0.571
Pyrimidine Metabolism, Orotate containing	Orotidine	0.189088	0.340498	1.57	0.0001	0.650765	-2.591	288.211	4	4	156.63	-2.397
Histidine Metabolism	N-acetyl-3-methylhistidine*	0.216055	0.409883	1.65	0.0002	0.722466	-1.007	211.218	3	1	84.21	-1.007
Alanine and Aspartate Metabolism	Asparagine	0.280726	0.411713	1.43	0.0002	0.516015	-4.408	132.118	2	2	106.41	-1.929
Chemical	2-aminophenol sulfate	0.269613	0.417178	2.93	0.0003	1.5509	0.448	189.189	1	1	98	0.448
Leucine, Isoleucine and Valine Metabolism	Beta-hydroxyisovaleroylcarnitine	0.314019	0.481218	1.64	0.0003	0.713696	-2.752	261.315	2	0	86.66	-2.752
Fatty Acid Synthesis	2-methylmalonyl carnitine	0.299861	0.417796	1.6	0.0003	0.678072	-2.638	261.272	3	0	103.73	-2.638
Leucine, Isoleucine and Valine Metabolism	2-methylbutyrylcarnitine (C5)	0.341529	0.476731	2.96	0.0004	1.5656	-1.326	245.315	2	0	66.43	-1.325
Phenylalanine and Tyrosine Metabolism	N-acetylphenylalanine	0.299321	0.375389	1.6	0.0005	0.678072	0.895	207.226	2	1	66.39	0.895
Phenylalanine and Tyrosine Metabolism	Phenylalanine	0.348594	0.395516	1.42	0.0005	0.505891	-1.605	165.189	1	1	63.31	0.874
Leucine, Isoleucine and Valine Metabolism	Beta-hydroxyisovalerate	0.294815	0.444071	1.6	0.0006	0.678072	-0.046	118.131	1	0	57.53	-0.046
Vitamin B6 Metabolism	Pyridoxate	0.288486	0.380938	1.64	0.0008	0.713696	-0.255	183.161	2	2	90.65	-0.255
Glutamate Metabolism	Pyroglutamine*	0.314521	0.437472	1.99	0.0009	0.992768	-1.413	128.129	2	2	72.19	-1.219
Histidine Metabolism	N-acetyl-1-methylhistidine*	0.172275	0.41714	1.68	0.0009	0.748461	-0.87	211.218	3	1	84.21	-0.87
Lysine Metabolism	3-methylglutarylcarnitine (1)	0.261376	0.424105	2.29	0.0011	1.19535	-2.358	289.325	3	0	103.72	-2.358
Pyrimidine Metabolism, Uracil containing	N-acetyl-beta-alanine	0.336643	0.426048	1.41	0.0012	0.495695	-0.897	131.13	2	1	66.39	-0.897
Benzoate Metabolism	Catechol sulfate	0.315036	0.45616	3.31	0.0014	1.72683	0.953	190.174	1	1	92.21	0.953
Leucine, Isoleucine and Valine Metabolism	Valine	0.320232	0.414998	1.42	0.0015	0.505891	-2.318	117.146	1	1	63.31	0.161
Phenylalanine and Tyrosine Metabolism	Phenyllactate (PLA)	0.369896	0.380186	1.54	0.0016	0.62293	1.163	166.174	1	1	57.53	1.163
Creatine Metabolism	Creatinine	0.292779	0.481151	1.22	0.0018	0.286881	-0.9	113.118	2	1	58.69	-0.9
Pyrimidine Metabolism, Uracil containing	2'-deoxyuridine	0.223606	0.3759	1.22	0.0026	0.286881	-1.685	228.202	3	3	99.09	-1.49
Pantothenate and CoA Metabolism	Pantothenate	0.332853	0.397909	1.35	0.0027	0.432959	-1.059	219.235	2	3	106.86	-1.059
Methionine, Cysteine, SAM and Taurine Metabolism	N-acetylmethionine	0.32871	0.400752	1.45	0.0031	0.536053	-0.334	191.248	2	1	91.7	-0.334
Carnitine Metabolism	Deoxycarnitine	0.341561	0.420099	1.41	0.0031	0.495695	-0.984	146.207	1	0	37.29	-0.984
Methionine, Cysteine, SAM and Taurine Metabolism	Methionine sulfoxide	0.359463	0.421531	2.4	0.0038	1.26303	-3.946	165.211	2	1	99.6	-1.467
Lysine Metabolism	3-methylglutarylcarnitine (2)	0.261376	0.424105	2.21	0.004	1.14405	-2.358	289.325	3	0	103.72	-2.358
Fatty Acid Metabolism (also BCAA Metabolism)	Butyrylcarnitine	0.297027	0.482813	3.84	0.0043	1.94111	-1.788	231.289	2	0	66.43	-1.788
Methionine, Cysteine, SAM and Taurine Metabolism	N-acetyltaurine	0.35286	0.475612	1.59	0.0047	0.669027	-1.222	167.184	1	1	91.85	-1.222
Pyrimidine Metabolism, Uracil containing	Uracil	0.360091	0.483062	1.38	0.005	0.464668	-1.012	112.087	2	2	58.2	-0.818
Fatty Acid Synthesis	Malonylcarnitine	0.285225	0.431492	1.33	0.007	0.411426	-3.101	247.245	3	0	103.73	-3.101
Inositol Metabolism	Chiro-inositol	0.357346	0.430793	1.7	0.0072	0.765535	-3.065	180.156	0	6	121.38	-3.065
Purine Metabolism, Guanine containing	7-methylguanine	0.269472	0.517872	1.45	0.0094	0.536053	-0.458	165.153	3	2	85.3	-0.458
Drug	Ketamine	0.306162	0.361604	1.93	0.0099	0.948601	2.88	237.725	1	1	29.1	2.88
Leucine, Isoleucine and Valine Metabolism	Isovalerylcarnitine	0.306711	0.481236	1.91	0.0105	0.933573	-1.536	245.315	2	0	66.43	-1.536
Purine Metabolism, Adenine containing	N6-carbamoylthreonyladenosine	-0.118574	0.342838	1.21	0.0107	0.275007	-2.563	412.355	6	6	212.18	-2.703
Polyamine Metabolism	Acisoga	0.307434	0.451972	1.46	0.011	0.545968	-0.911	184.236	2	1	49.41	-0.911
Food Component/Plant	Indolin-2-one	0.411147	0.458033	0.29	0.011	-1.78588	0.819	133.147	1	1	29.1	0.819
Leucine, Isoleucine and Valine Metabolism	Isobutyrylcarnitine	0.343301	0.475097	1.59	0.0133	0.669027	-1.782	231.289	2	0	66.43	-1.782
Alanine and Aspartate Metabolism	N-acetylalanine	0.274391	0.394219	1.29	0.0135	0.367371	-0.661	131.13	2	1	66.39	-0.661
Leucine, Isoleucine and Valine Metabolism	3-methylglutaconate	0.322029	0.380848	1.2	0.0136	0.263034	0.52	144.125	2	0	74.59	0.52
Glycine, Serine and Threonine Metabolism	Threonine	0.340334	0.399353	0.81	0.0136	-0.304006	-3.672	119.119	1	2	83.55	-1.193
Leucine, Isoleucine and Valine Metabolism	3-hydroxyisobutyrate	0.320457	0.405293	1.22	0.0138	0.286881	-0.166	104.105	1	1	57.53	-0.166
Histidine Metabolism	3-methylhistidine	0.256728	0.430663	1.77	0.0139	0.823749	-3.507	169.181	2	1	81.14	-1.028
Purine Metabolism, (Hypo)Xanthine/Inosine containing	Xanthosine	0.158766	0.420726	2.51	0.0146	1.32769	-2.434	284.225	4	5	145.94	-2.24
Aminosugar Metabolism	Erythronate*	0.307568	0.396383	1.15	0.0161	0.201634	-1.792	136.103	1	3	97.99	-1.792
Purine Metabolism, (Hypo)Xanthine/Inosine containing	Allantoin	0.296624	0.470841	1.27	0.0163	0.344828	-1.76	158.115	3	4	113.32	-1.565
Gamma-glutamyl Amino Acid	Gamma-glutamylisoleucine*	0.329673	0.410234	2.73	0.0173	1.4489	-2.616	260.287	3	2	129.72	-0.137
Purine Metabolism, Adenine containing	N1-methyladenosine	0.185205	0.443348	1.19	0.0194	0.250962	-1.988	281.268	3	3	127.19	-1.464
Pyrimidine Metabolism, Uracil containing	Pseudouridine	0.269425	0.440512	1.13	0.0204	0.176323	-2.933	244.201	3	5	128.12	-2.738
Leucine, Isoleucine and Valine Metabolism	Leucine	0.271474	0.413974	1.19	0.0233	0.250962	-1.93	131.173	1	1	63.31	0.549
Ketone Bodies	3-hydroxybutyrate (BHBA)	0.32018	0.398814	0.75	0.0243	-0.415037	-0.251	104.105	1	1	57.53	-0.251
Purine Metabolism, (Hypo)Xanthine/Inosine containing	Allantoic acid	0.290098	0.416303	1.76	0.0247	0.815575	-1.954	176.131	3	4	147.54	-1.954
Polyamine Metabolism	4-acetamidobutanoate	0.339607	0.420794	1.11	0.0256	0.15056	-0.576	145.156	2	1	66.39	-0.576
Pyrimidine Metabolism, Cytidine containing	5-methyl-2'-deoxycytidine	0.201251	0.417436	1.15	0.026	0.201634	-1.184	241.244	3	3	108.37	-1.184
Leucine, Isoleucine and Valine Metabolism	3-hydroxy-2-ethylpropionate	0.30706	0.414315	1.24	0.0261	0.31034	0.29	118.131	1	1	57.53	0.29
Lysine Metabolism	Glutarylcarnitine (C5)	0.211097	0.41696	1.72	0.0274	0.782409	-2.61	275.298	3	0	103.73	-2.61
Glutamate Metabolism	Carboxyethyl-GABA*	0.342127	0.434284	1.28	0.0292	0.356144	-3.14	175.182	2	1	86.63	-0.436
Mevalonate Metabolism	3-hydroxy-3-methylglutarate	0.302287	0.444071	0.82	0.0362	-0.286304	-0.665	162.141	2	0	94.82	-0.665
Methionine, Cysteine, SAM and Taurine Metabolism	Methionine	0.369384	0.421531	1.23	0.0365	0.298658	-2.834	149.211	1	1	88.62	-0.355
Leucine, Isoleucine and Valine Metabolism	Isovalerate	0.27991	0.414289	1.22	0.0373	0.286881	1.17	102.132	1	0	37.29	1.17
Glycine, Serine and Threonine Metabolism	N-acetylglycine	0.316281	0.424224	1.21	0.0389	0.275007	-1.145	117.103	2	1	66.39	-1.145
Urea cycle; Arginine and Proline Metabolism	Dimethylarginine (SDMA + ADMA)	0.297566	0.39683	1.11	0.0405	0.15056	-3.419	202.254	2	2	104.93	-0.94
Leucine, Isoleucine and Valine Metabolism	N-acetylisoleucine	0.247017	0.394999	1.37	0.0406	0.454176	0.638	173.21	2	1	66.39	0.638
Phenylalanine and Tyrosine Metabolism	Phenol sulfate	0.393369	0.48018	1.84	0.0411	0.879706	1.195	174.174	1	0	71.98	1.195
Leucine, Isoleucine and Valine Metabolism	4-methyl-2-oxopentanoate	0.315697	0.405123	1.14	0.042	0.189034	1.046	130.142	2	0	54.37	1.046
Nicotinate and Nicotinamide Metabolism	Nicotinamide	0.15912	0.492302	0.66	0.0432	-0.599462	-0.319	122.125	2	1	55.98	-0.319
Polyamine Metabolism	N-acetylputrescine	0.365261	0.487059	0.88	0.0439	-0.184425	-0.813	130.188	1	2	55.12	-0.813
Gamma-glutamyl Amino Acid	Gamma-glutamylthreonine*	0.306257	0.392954	0.76	0.0445	-0.395929	-4.426	248.233	3	3	149.94	-1.947
Urea cycle; Arginine and Proline Metabolism	Trans-4-hydroxyproline	0.321344	0.3749	1.5	0.0447	0.584963	-3.934	131.13	1	2	69.56	-1.229
Fatty Acid, Dicarboxylate	Dimethylmalonic acid	0.345676	0.413721	1.42	0.0452	0.505891	0.485	132.115	2	0	74.59	0.485
Pyrimidine Metabolism, Orotate containing	Orotate	0.304179	0.395261	1.2	0.0456	0.263034	-1.152	156.096	3	2	95.5	-0.958
