# Supplementary material for: Metabolomic and transcriptomic analysis reveals endogenous substrates and metabolic adaptation in rats lacking Abcg2 and Abcb1a transporters
Source: PLoS One. 2021 Jul 13;16(7):e0253852. doi: 10.1371/journal.pone.0253852 (PMC8277073; doi:10.1371/journal.pone.0253852)
Supplement: S7 Table — (XLSX) [file pone.0253852.s014.xlsx]

## Sheet: Table S5
S7 Table. Significantly altered CYP genes in dKO rats compared to WT rats
			Liver			Brain			Kidney
Gene Symbol	regulation		Fold change	p-value		Fold change	p-value		Fold change	p-value
Cyp4v3	UP					1.33	0.02		1.24	0.01
Cyp4a8	DOWN		0.71	0
Cyp4a3	UP								1.5	0
Cyp3a85-ps	DOWN		0.58	0
Cyp3a73	DOWN		0.67	0
Cyp2j4	UP		1.34	0.01					1.61	0
Cyp2g1	DOWN					0.72	0.04
Cyp2d5	DOWN		0.54	0					0.33	0
Cyp2d2	DOWN								0.75	0
Cyp2d1	DOWN								0.71	0
Cyp2c12	DOWN		0.56	0
Cyp2c11	UP								1.77	0
Cyp2b2	UP		1.24	0.04
Cyp2b1	UP		2.66	0
Cyp26a1	UP		1.39	0.01
Cyp24a1	UP								1.79	0
Cyp1a1	UP								1.76	0
